# Supplementary material
Source: publisher figshare collection journal article supplement (https://sage.figshare.com/ndownloader/files/15681107)
Supplement: Supplementary file 1 [file 15681107]

**Online appendix: The effect of public attitudes towards the EU on European Commission policy activity**

Christopher Williams, School of Public Affairs, University of Arkansas at Little Rock, Little Rock, AR, USA

Shaun Bevan, Politics and International Relations, University of Edinburgh, Edinburgh, Scotland, UK

**Table of Contents**

Table A.1: Effect of Public Negativity (Neutrality plus Euroscepticism) on Unilateral Commission Legal Act Adoption . . . . .Page 2

Table A.2: Descriptive Statistics . . . . . Page 3

Table A.3: Effect of Average Public Attitudes Towards the EU on Unilateral Commission Legal Act Adoption. . . . . Page 4

Table A.4: Effect of Public Attitudes on Unilateral Commission Legal Act Adoption Controlling for EU GDP. . . . . Page 5

Table A.5: Number and Survey Date of Eurobarometer Surveys Used. . . . .Page 6

Table A.6: Effect of Public Attitudes Towards the EU on Unilateral Commission Legal Act Adoption Using Paired Independent Variables. . . . .Page 8

**Table A.1: Effect of Public Negativity (Neutrality plus Euroscepticism) on Unilateral Commission Legal Act Adoption**

|                                           | Model 1               | Model 2               | Model 3               | Model 4               |
|-------------------------------------------|-----------------------|-----------------------|-----------------------|-----------------------|
| Legal Act Adoption <sub>t-1</sub>         | -0.30<br>(0.08)***    | -0.49<br>(0.11)***    | -0.55<br>(0.11)***    | -0.74<br>(0.15)***    |
| $\Delta$ Negativity <sub>t</sub>          | 1.00<br>(9.81)        | 6.71<br>(8.93)        | 8.22<br>(8.96)        | 3.63<br>(9.11)        |
| Negativity <sub>-1</sub>                  | 9.51<br>(5.71)*       | 14.89<br>(5.80)**     | 14.94<br>(5.91)**     | 8.03<br>(4.94)        |
| $\Delta$ Unemployment <sub>t</sub>        |                       | -104.64<br>(56.29)*   | -70.57<br>(55.22)     | 1.19<br>(61.22)       |
| Unemployment <sub>t-1</sub>               |                       | 43.89<br>(17.37)**    | 57.26<br>(19.50)***   | 66.82<br>(18.44)***   |
| Single Europe Act                         |                       |                       | -120.50<br>(123.41)   | -103.51<br>(128.15)   |
| Maastricht Treaty                         |                       |                       | -235.61<br>(64.19)*** | -263.85<br>(59.62)*** |
| Amsterdam Treaty                          |                       |                       | 279.90<br>(112.43)**  | 340.84<br>(125.67)*** |
| Nice Treaty                               |                       |                       | -14.16<br>(283.53)    | -75.49<br>(257.02)    |
| $\Delta$ Council Legislation <sub>t</sub> |                       |                       |                       | -0.90<br>(0.60)       |
| Council Legislation <sub>t-1</sub>        |                       |                       |                       | -1.60<br>(0.66)**     |
| Constant                                  | -147.96<br>(204.93)** | -568.64<br>(259.11)** | -631.06<br>(266.37)** | -11.99<br>(301.36)*** |
| $R^2$                                     | 0.16                  | 0.28                  | 0.34                  | 0.42                  |
| $N$                                       | 68                    | 68                    | 68                    | 68                    |

Note: Standard errors are in parentheses; \*  $p < 0.1$ ; \*\*  $p < 0.05$ ; \*\*\*  $p < 0.01$

**Table A.2: Descriptive Statistics**

| <b>Variable</b>              | <b>N</b> | <b>Mean</b> | <b>SD</b> | <b>Min.</b> | <b>Max.</b> |
|------------------------------|----------|-------------|-----------|-------------|-------------|
| Commission Legal Acts        | 68       | 740.88      | 364.24    | 257         | 1568        |
| Europhilia                   | 68       | 59.85       | 6.48      | 42.42       | 74.47       |
| Euroscepticism               | 68       | 12.87       | 2.64      | 6.56        | 17.44       |
| Neutrality towards EU        | 68       | 26.99       | 4.02      | 16.32       | 34.47       |
| Unemployment                 | 68       | 8.04        | 1.75      | 4.18        | 10.73       |
| Single Europe Act Dummy      | 68       | 0.03        | 0.17      | 0           | 1           |
| Maastricht Treaty Dummy      | 68       | 0.03        | 0.17      | 0           | 1           |
| Amsterdam Treaty Dummy       | 68       | 0.03        | 0.17      | 0           | 1           |
| Nice Treaty Dummy            | 68       | 0.03        | 0.17      | 0           | 1           |
| Council Legislative Activity | 68       | 179.65      | 82.97     | 49          | 394         |

**Table A.3: Effect of Average Public Attitudes Towards the EU on Unilateral Commission Legal Act Adoption**

|                                           | Model 1              | Model 2                | Model 3                | Model 4               |
|-------------------------------------------|----------------------|------------------------|------------------------|-----------------------|
| Legal Act Adoption <sub>t-1</sub>         | -0.28<br>(0.08)***   | -0.48<br>(0.12)***     | -0.54<br>(0.12)***     | -0.73<br>(0.16)***    |
| $\Delta$ Average Attitudes <sub>t</sub>   | -860.65<br>(636.47)  | -1066.55<br>(569.63)*  | -1113.34<br>(553.69)** | -730.25<br>(544.80)   |
| Average Attitudes <sub>t-1</sub>          | -595.18<br>(408.26)  | -1038.50<br>(428.64)** | -1052.28<br>(431.92)** | -664.22<br>(370.91)*  |
| $\Delta$ Unemployment <sub>t</sub>        |                      | -110.71<br>(60.11)*    | -73.70<br>(57.18)      | -8.59<br>(57.62)      |
| Unemployment <sub>t-1</sub>               |                      | 46.66<br>(18.85)**     | 60.75<br>(21.08)***    | 69.22<br>(19.40)***   |
| Single Europe Act                         |                      |                        | -130.97<br>(102.20)    | -110.71<br>(105.35)   |
| Maastricht Treaty                         |                      |                        | -254.61<br>(65.18)***  | -278.62<br>(61.62)*** |
| Amsterdam Treaty                          |                      |                        | 273.96<br>(104.59)**   | 330.71<br>(118.08)*** |
| Nice Treaty                               |                      |                        | -26.95<br>(309.81)     | -84.54<br>(280.74)    |
| $\Delta$ Council Legislation <sub>t</sub> |                      |                        |                        | -0.86<br>(0.61)       |
| Council Legislation <sub>t-1</sub>        |                      |                        |                        | -1.49<br>(0.62)**     |
| Constant                                  | 491.70<br>(228.56)** | 480.28<br>(299.39)**   | 422.20<br>(196.73)**   | 575.98<br>(210.54)*** |
| $R^2$                                     | 0.17                 | 0.30                   | 0.36                   | 0.44                  |
| $N$                                       | 68                   | 68                     | 68                     | 68                    |

Note: Standard errors are in parentheses; \*  $p < 0.1$ ; \*\*  $p < 0.05$ ; \*\*\*  $p < 0.01$

**Table A.4: Effect of Public Attitudes on Unilateral Commission Legal Act Adoption Controlling for EU GDP**

|                                           | Model 1              | Model 2               | Model 3              |
|-------------------------------------------|----------------------|-----------------------|----------------------|
| Legal Act Adoption <sub>t-1</sub>         | -0.48<br>(0.14)***   | -0.47<br>(0.12)***    | -0.50<br>(0.12)***   |
| $\Delta$ Attitudes <sub>t</sub>           | -4.71<br>(9.03)      | -2.72<br>(15.37)      | -3.40<br>(11.35)     |
| Attitudes <sub>t-1</sub>                  | -7.18<br>(5.34)      | -0.50<br>(10.66)      | 15.04<br>(8.78)      |
| $\Delta$ EU GDP <sub>t</sub>              | -0.00<br>(0.00)**    | -0.00<br>(0.00)**     | -0.00<br>(0.00)***   |
| EU GDP <sub>t-1</sub>                     | 0.00<br>(0.00)       | 0.00<br>(0.00)        | 0.00<br>(0.00)       |
| Single Europe Act                         | 0.14<br>(49.18)      | -31.61<br>(56.62)     | 10.40<br>(64.02)     |
| Maastricht Treaty                         | -127.57<br>(49.60)** | -118.64<br>(38.16)*** | -107.10<br>(47.42)** |
| Amsterdam Treaty                          | 235.28<br>(67.37)*** | 240.29<br>(67.16)***  | 216.14<br>(64.09)*** |
| Nice Treaty                               | -88.73<br>(250.31)   | -84.68<br>(233.77)    | -89.72<br>(219.61)   |
| $\Delta$ Council Legislation <sub>t</sub> | -0.39<br>(0.79)      | -0.87<br>(0.80)       | -0.28<br>(0.73)      |
| Council Legislation <sub>t-1</sub>        | -0.32<br>(0.99)      | -0.53<br>(0.99)       | -0.25<br>(0.91)      |
| Constant                                  | 590.55<br>(392.83)   | 302.92<br>(452.35)    | -256.72<br>(421.90)  |
| $R^2$                                     | 0.38                 | 0.36                  | 0.40                 |
| $N$                                       | 68                   | 68                    | 68                   |

*Note:* Model 1 examines public Europhilia, Model 2 examines public Euroscepticism, Model 3 examines public neutrality. Standard errors are in parentheses; \*  $p < 0.1$ ; \*\*  $p < 0.05$ ; \*\*\*  $p < 0.01$

**Table A.5: Number and Survey Date of Eurobarometer Surveys Used**

| <b>Survey Number</b> | <b>Date</b>              |
|----------------------|--------------------------|
| 2                    | October – November 1974  |
| 3                    | May 1975                 |
| 4                    | October – November 1975  |
| 5                    | May 1976                 |
| 6                    | October – November 1976  |
| 7                    | April 1977               |
| 8                    | November 1977            |
| 9                    | April 1978               |
| 10                   | November 1978            |
| 11                   | April 1979               |
| 12                   | October – November 1979  |
| 13                   | April 1980               |
| 14                   | October 1980             |
| 15                   | April 1981               |
| 16                   | October 1981             |
| 17                   | April 1982               |
| 18                   | October 1982             |
| 19                   | April 1983               |
| 20                   | October 1983             |
| 21                   | March – April 1984       |
| 22                   | October 1984             |
| 23                   | April 1985               |
| 24                   | October 1985             |
| 25                   | April 1986               |
| 26                   | November 1986            |
| 27                   | March – May 1987         |
| 28                   | November 1987            |
| 29                   | March – April 1988       |
| 30                   | October – November 1988  |
| 31                   | March – April 1989       |
| 32                   | October – November 1989  |
| 33                   | March – April 1990       |
| 34                   | October – November 1990  |
| 35                   | March 1991               |
| 36                   | October – November 1991  |
| 37                   | March – April 1992       |
| 38                   | September – October 1992 |
| 39                   | March – April 1993       |
| 40                   | September – October 1993 |
| 41                   | March – June 1994        |
| 42                   | November – December 1994 |
| 43.1B                | May – June 1995          |

|      |                           |
|------|---------------------------|
| 44   | October – November 1995   |
| 45.1 | April – May 1996          |
| 46   | October – November 1996   |
| 47.2 | April – June 1997         |
| 48   | October – November 1997   |
| 49   | April – May 1998          |
| 50   | October – November 1998   |
| 51   | March – May 1999          |
| 52   | October – November 1999   |
| 53   | April – May 2000          |
| 54.1 | November – December 2000  |
| 55.1 | April – May 2001          |
| 56.2 | October – November 2001   |
| 57.1 | March – May 2002          |
| 58.1 | October – November 2002   |
| 59.1 | March – April 2003        |
| 60.1 | October – November 2003   |
| 61   | February – March 2004     |
| 62   | October – November 2004   |
| 63.4 | May – June 2005           |
| 64.2 | October – November 2005   |
| 65.1 | February – March 2006     |
| 66.1 | September – October 2006  |
| 67.2 | April – May 2007          |
| 68.1 | September – November 2007 |
| 69.2 | March – May 2008          |
| 70.1 | October – November 2008   |



**Table A.6: Effect of Public Attitudes Towards the EU on Unilateral Commission Legal Act Adoption Using Paired Independent Variables**

|                                   | Model 1                 | Model 2              | Model 3              |
|-----------------------------------|-------------------------|----------------------|----------------------|
| Legal Act Adoption <sub>t-1</sub> | -0.46<br>(0.10)***      | -0.34<br>(0.10)***   | -0.44<br>(0.10)***   |
| $\Delta$ Support <sub>t</sub>     | -34.52<br>(8.87)***     | -15.32<br>(13.95)    |                      |
| Support <sub>t-1</sub>            | -47.31<br>(11.39)***    | 1.10<br>(14.05)      |                      |
| $\Delta$ Euroscepticism           | -43.17<br>(16.84)**     |                      | -1.21<br>(14.65)     |
| Euroscepticism <sub>t-1</sub>     | -90.55<br>(24.76)***    |                      | -31.68<br>(15.93)*   |
| $\Delta$ Neutrality <sub>t</sub>  |                         | -9.30<br>(20.12)     | 14.47<br>(13.04)     |
| Neutrality <sub>t-1</sub>         |                         | 22.04<br>(23.91)     | 41.61<br>(13.43)***  |
| Constant                          | 4341.97<br>(1042.00)*** | -403.07<br>(1423.22) | -381.92<br>(214.59)* |
| $R^2$                             | 0.34                    | 0.25                 | 0.25                 |
| $N$                               | 68                      | 68                   | 68                   |
| $F$                               | 7.80                    | 3.80                 | 4.77                 |
| $P > F$                           | 0.000                   | 0.005                | 0.001                |

Note: Standard errors are in parentheses; \*  $p < 0.1$ ; \*\*  $p < 0.05$ ; \*\*\*  $p < 0.01$
